# Supplementary material for: A possible case of inverted lifestyle in a new bivalved arthropod from the Burgess Shale
Source: R Soc Open Sci. 2019 Nov 13;6(11):191350. doi: 10.1098/rsos.191350 (PMC6894550; doi:10.1098/rsos.191350)
Supplement: Character matrix phylogeny [file rsos191350supp5.xlsx]

## Sheet: Sheet1
TAXA	seg typ	cal cuticle	cal type	holometa	ex ant	lobop	type lob	flap like limb	limb insert	med eye	numb med	rhab l eye	type l eye	corneageous	tetraconate	nested opti	rhabdomeres	eyes tergal	ophtalmi ridg	lateral eyes ped	ped proj	somital head	somites	terg ocl	terg type	tergal scler	terg scl type	valves	carap type	bivalved conf	cov bival	articul	segm impress	occipidal lobe	pair carinae	anterior red	compaction	doublure	cephalic kinesis	ganglia fused	contiguity	fan shaped	midline neuropil	olfacto lobes	deuterocerebral lobe	protocerebral bridge	sternites	endostern	labrum
Opabinia	0	0	-	-	1	0	-	1	-	1	1	1	1	?	?	?	?	-	-	1	0	0	?	0	-	0	-	-	-	-	-	-	-	-	-	0	-	-	-	?	?	?	?	?	?	?	0	?	?
Anomalocaris	0	0	-	-	?	0	-	1	0	0	-	1	1	?	?	?	0	-	-	1	0	?	?	1	0	1	-	-	-	-	-	-	-	-	-	-	-	-	-	?	?	?	?	?	?	?	0	?	0
Hurdia	0	0	-	-	?	0	-	1	0	0	-	1	1	?	?	?	?	0	-	1	0	?	?	?	?	1	0	0	1	0	1	-	-	-	-	-	-	-	?	?	?	?	?	?	?	?	0	?	0
Peytoia	0	0	-	-	1	0	-	1	0	0	-	1	1	?	?	?	?	?	?	1	0	?	?	?	?	?	?	?	?	?	?	?	?	?	?	-	-	-	?	?	?	?	?	?	?	?	0	?	0
Schinderhannes	0	?	-	-	1	?	?	?	-	0	-	1	1	?	?	?	?	?	?	1	0	0	?	?	?	?	?	?	?	?	?	?	?	?	?	0	-	?	?	?	?	?	?	?	?	?	0	?	?
Surusicaris	0	0	-	-	0	1	0	0	-	0	-	1	1	?	?	?	?	0	-	1	0	1	0	0	-	1	0	0	1	1	0	-	-	-	-	0	-	0	0	?	?	?	?	?	?	?	0	?	0
Isoxys	0	0	-	-	?	?	?	?	-	0	-	1	1	?	?	?	?	0	-	1	0	?	?	0	-	1	0	0	1	1	0	-	-	-	-	0	-	0	0	?	?	?	?	?	?	?	0	?	?
Clypecaris	1	0	-	-	0	0	-	0	-	0	-	1	1	?	?	?	?	0	-	1	1	1	0	0	-	1	0	0	1	0	1	-	-	-	-	?	-	0	0	?	?	?	?	?	?	?	0	?	?
Fibulacaris_nereidis	?	0	-	-	0	0	-	0	-	0	-	1	1	?	?	?	?	0	-	1	0	?	?	?	?	1	0	0	1	1	0	-	-	-	-	1	-	1	0	?	?	?	?	?	?	?	?	?	?
Perspicaris	1	0	-	-	0	0	-	0	-	0	-	1	1	?	?	?	?	0	-	1	1	1	?	0	-	1	0	0	1	0	1	-	-	-	-	?	-	1	0	?	?	?	?	?	?	?	?	?	?
Nereocaris_exilis	1	0	-	-	0	0	-	0	-	0	-	1	1	?	?	?	?	0	-	1	1	1	?	?	?	1	0	0	1	1	0	-	-	-	-	?	-	?	0	?	?	?	?	?	?	?	?	?	?
Nereocaris_briggsi	1	0	-	-	0	0	-	0	-	?	-	1	1	?	?	?	?	0	-	1	1	1	?	?	?	1	0	0	1	1	0	-	-	-	-	?	-	?	0	?	?	?	?	?	?	?	?	?	?
Loricicaris	1	0	-	-	0	0	-	0	-	0	-	1	1	?	?	?	?	0	-	1	0	1	1	0	-	1	0	0	1	1	1	-	-	-	-	1	-	?	0	?	?	?	?	?	?	?	?	?	?
Canadaspis	1	0	-	-	0	0	-	0	-	0	-	1	1	?	?	?	?	0	-	1	0	1	?	1	(01)	1	0	0	1	0	1	-	-	-	-	?	?	?	0	?	?	?	?	?	?	?	1	?	?
Branchiocaris	1	0	-	-	0	0	-	0	-	0	-	?	?	?	?	?	?	0	-	?	0	1	1	1	0	1	0	0	1	0	0	-	-	-	-	1	-	1	0	?	?	?	?	?	?	?	1	?	1
Tokummia	1	0	-	-	0	0	-	0	-	0	-	?	?	?	?	?	?	0	-	?	0	1	1	1	1	1	0	0	1	0	0	-	-	-	-	1	-	1	0	?	?	?	?	?	?	?	1	?	1
Waptia	1	0	-	-	0	0	-	0	-	0	-	1	1	?	?	?	?	0	-	1	1	1	?	1	1	1	0	0	1	1	1	-	-	-	-	1	-	1	0	?	?	?	?	?	?	?	1	?	1
Ercaicunia	1	0	-	-	0	0	-	0	-	0	-	0	-	-	-	-	-	-	-	-	-	1	?	1	1	1	0	0	1	1	1	-	-	-	-	1	-	1	0	?	?	?	?	?	?	?	1	?	1
Odaraia	1	0	-	-	0	0	-	0	-	0	-	1	1	?	?	?	?	0	-	1	1	1	?	?	?	1	0	0	1	1	0	-	-	-	-	?	-	1	0	?	?	?	?	?	?	?	1	?	?
Yohoia	1	0	-	-	0	0	-	0	-	0	-	1	1	?	?	?	?	0	-	0	-	1	0	0	-	1	1	-	-	-	-	0	0	0	0	0	-	0	0	?	?	?	?	?	?	?	1	?	?
Haikoucaris	1	0	-	-	0	0	-	0	-	?	?	1	1	?	?	?	?	?	-	0	-	1	0	?	?	1	1	-	-	-	-	0	0	0	0	0	-	?	0	?	?	?	?	?	?	?	?	?	?
Leanchoiliidae	1	0	-	-	0	0	-	0	-	1	0	1	1	?	?	0	?	0	-	0	-	1	0	0	-	1	1	-	-	-	-	0	0	0	(01)	0	-	0	0	?	1	?	?	?	?	?	1	?	1
Fortiforceps	1	0	-	-	0	0	-	0	-	0	-	1	1	?	?	?	?	?	-	1	1	1	0	?	?	1	1	-	-	-	-	0	0	0	0	0	-	?	?	?	?	?	?	?	?	?	1	?	?
Yawunik	1	0	-	-	0	0	-	0	-	1	0	1	1	?	?	?	?	0	-	0	-	1	?	0	-	1	1	-	-	-	-	0	0	0	0	0	-	0	0	?	?	?	?	?	?	?	1	?	?
Sanctacaris	1	0	-	-	0	0	-	0	-	0	-	1	1	?	?	?	?	0	-	0	-	1	3	0	-	1	1	-	-	-	-	0	0	0	0	1	0	1	0	?	?	?	?	?	?	?	1	?	1
Habelia	1	0	-	-	0	0	-	0	-	0	-	1	1	?	?	?	?	0	-	0	-	1	3	0	-	1	1	-	-	-	-	0	0	0	0	1	0	1	0	?	?	?	?	?	?	?	1	?	1
Ercaia	1	0	-	-	0	0	-	0	-	0	-	1	1	?	?	?	?	0	-	1	0	1	0	?	?	1	1	-	-	-	-	1	0	0	0	0	-	1	0	?	?	?	?	?	?	?	1	?	?
Kuamaia	1	0	-	-	0	0	-	0	-	0	-	1	1	?	?	?	?	1	-	0	-	1	0	1	0	1	1	-	-	-	-	0	0	?	0	0	-	?	0	?	?	?	?	?	?	?	1	?	1
Marrella	1	0	-	-	0	0	-	0	-	0	-	0	-	-	-	-	-	-	-	-	-	1	0	0	-	1	1	-	-	-	-	1	0	?	0	0	-	1	0	?	?	?	?	?	?	?	1	?	1
Burgessia	1	0	-	-	0	0	-	0	-	0	-	?	?	?	?	?	?	0	-	?	?	1	0	?	?	1	0	1	-	-	-	-	-	-	-	0	-	0	0	?	?	?	?	?	?	?	1	?	?
Emeraldella	1	0	-	-	0	0	-	0	-	0	-	?	?	?	?	?	?	0	-	?	?	1	1	0	-	1	1	-	-	-	-	0	0	?	0	0	-	1	0	?	?	?	?	?	?	?	1	?	1
Sidneyia	1	0	-	-	0	0	-	0	-	0	-	1	1	?	?	?	?	0	-	1	0	1	?	0	-	1	1	-	-	-	-	0	0	0	0	0	-	1	0	?	?	?	?	?	?	?	1	?	1
Aglaspis	1	1	(01)	-	0	0	-	0	-	0	-	1	1	?	?	?	?	1	0	0	-	1	?	0	-	1	1	-	-	-	-	0	0	1	0	0	-	1	0	?	?	?	?	?	?	?	1	?	1
Naraoia	1	0	-	-	0	0	-	0	-	0	-	1	1	?	?	?	-	0	-	?	?	1	0	0	-	1	1	-	-	-	-	0	0	0	0	0	-	1	0	?	?	?	?	?	?	?	1	?	1
Olenoides	1	1	0	-	0	0	-	0	-	0	-	1	1	?	?	?	0	1	1	0	-	1	0	0	-	1	1	-	-	-	-	0	1	1	0	0	-	1	0	?	?	?	?	?	?	?	1	?	1
Peronopsis	1	0	-	-	0	0	-	0	-	0	-	0	-	-	-	-	?	-	-	-	-	1	0	0	-	1	1	-	-	-	-	0	0	1	0	0	-	1	0	?	?	?	?	?	?	?	1	?	1
Xandarella	1	0	-	-	0	0	-	0	-	0	-	1	1	?	?	?	?	1	0	0	-	1	2	0	-	1	1	-	-	-	-	0	?	0	0	0	-	1	0	?	?	?	?	?	?	?	1	?	1
Tegopelte	1	0	-	-	0	0	-	0	-	0	-	0	-	-	-	-	?	-	-	-	-	1	0	0	-	1	0	1	-	-	-	0	0	0	0	0	-	1	0	?	?	?	?	?	?	?	1	?	1
Kodymirus	1	0	-	-	0	0	-	0	-	0	-	1	1	?	?	?	?	1	1	0	0	1	0	0	-	1	1	-	-	-	-	0	1	0	0	0	-	1	0	?	?	?	?	?	?	?	1	?	1
Pycnogonida	1	0	-	-	0	0	-	0	-	1	2	0	-	-	-	-	-	1	0	-	-	1	0	0	-	1	1	-	-	-	-	-	-	-	-	-	-	1	0	0	?	?	?	?	?	0	1	?	1
Offacolus	1	0	-	-	0	0	-	0	-	?	?	1	1	?	?	?	?	?	?	?	?	1	3	?	?	1	1	-	-	-	-	0	0	?	0	1	0	1	0	?	?	?	?	?	?	?	1	?	?
Dibasterium	1	0	-	-	0	0	-	0	-	?	?	?	?	?	?	?	?	0	?	?	?	1	2	0	-	1	1	-	-	-	-	0	0	0	0	1	0	1	0	?	?	?	?	?	?	?	1	?	?
Tanazios1	1	0	-	-	0	0	-	0	-	0	-	0	-	-	-	-	-	-	-	-	-	1	2	0	-	1	1	-	-	-	-	0	0	0	0	1	1	1	0	?	?	?	?	?	?	?	?	?	1
Tanazios2	1	0	-	-	0	0	-	0	-	0	-	0	-	-	-	-	-	-	-	-	-	1	2	0	-	1	1	-	-	-	-	0	0	0	0	1	1	1	0	?	?	?	?	?	?	?	?	?	1
Cascolus	1	0	-	-	0	0	-	0	-	0	-	1	1	?	?	?	?	0	-	1	1	1	1	0	-	1	1	-	-	-	-	1	1	0	0	0	0	1	0	?	?	?	?	?	?	?	1	?	1
Chasmataspis	1	0	-	-	0	0	-	0	-	1	0	1	1	?	?	?	?	1	0	0	-	1	?	?	-	1	1	-	-	-	-	1	0	1	0	0	-	1	0	?	?	?	?	?	?	?	1	?	?
Weinbergina	1	0	-	-	0	0	-	0	-	1	0	1	1	?	?	?	?	?	0	?	?	1	3	?	-	1	1	-	-	-	-	0	0	?	0	0	-	1	0	?	?	?	?	?	?	?	1	?	?
Megalograptus	1	0	-	-	0	0	-	0	-	0	-	1	1	?	?	?	?	1	0	0	-	1	2	?	-	1	1	-	-	-	-	1	0	0	0	0	-	1	0	?	?	?	?	?	?	?	1	?	1
Limulus	1	0	-	-	0	0	-	0	-	1	0	1	1	0	?	?	0	1	1	0	-	1	3	0	-	1	1	-	-	-	-	0	0	1	1	0	-	1	0	1	0	0	0	0	0	0	1	1	1
Scorpiones	1	0	-	-	0	0	-	0	-	1	0	1	(01)	0	0	0	0	1	0	0	-	1	2	0	-	1	1	-	-	-	-	1	0	0	0	0	-	1	0	1	0	0	0	0	?	0	1	1	1
Opiliones	1	0	-	-	0	0	-	0	-	(01)	-	1	0	?	0	0	0	1	0	0	-	1	2	0	-	1	1	-	-	-	-	1	0	0	0	0	-	1	0	1	0	0	?	?	?	?	1	1	1
Araneae	1	0	-	-	0	0	-	0	-	1	(02)	1	0	0	0	1	0	1	0	0	-	1	2	0	-	1	1	-	-	-	-	1	1	0	0	0	-	1	0	1	0	0	0	0	0	0	1	1	1
Archegozetes	1	0	-	-	0	0	-	0	-	0	-	0	-	0	-	-	-	-	-	-	-	1	2	1	1	1	1	-	-	-	-	1	0	0	0	0	-	1	0	1	0	0	?	?	?	?	1	1	1
Shankouia	1	0	-	-	0	0	-	0	-	?	?	1	1	?	?	?	?	0	0	1	1	1	?	1	0	1	0	1	-	-	-	-	-	-	-	1	-	1	0	?	?	?	?	?	?	?	1	?	1
Fuxianhuia	1	0	-	-	0	0	-	0	-	?	?	1	1	?	?	2	0	0	0	1	1	1	?	1	0	1	0	0	0	-	-	-	-	-	-	1	-	1	0	?	?	?	?	?	?	?	?	?	1
Chengjiangocaris	1	0	-	-	0	0	-	0	-	?	?	1	1	?	?	?	?	0	0	1	1	1	?	1	0	1	0	1	-	-	-	-	-	-	-	1	-	1	0	0	?	?	?	?	?	?	?	?	1
Euthycarcinoidea	1	0	-	-	0	0	-	0	-	0	-	1	1	?	?	?	?	0	0	1	1	1	?	1	0	1	1	-	-	-	-	1	0	0	0	1	1	1	0	?	?	?	?	?	?	?	1	?	1
Aquilonifer	1	0	-	-	0	0	-	0	-	0	-	0	-	-	-	-	-	-	-	-	-	1	0	0	-	1	1	-	-	-	-	1	0	0	0	0	0	?	0	?	?	?	?	?	?	?	1	?	?
Arthropleura	1	0	-	-	0	0	-	0	-	0	-	0	-	-	-	-	-	-	-	-	-	1	1	?	?	1	1	-	-	-	-	1	0	0	0	1	1	1	?	?	?	?	?	?	?	?	1	?	?
Pauropoda	1	0	-	-	0	0	-	0	-	0	-	0	-	-	-	-	-	-	-	-	-	1	1	0	-	1	1	-	-	-	-	1	0	0	0	1	1	1	0	0	1	?	?	?	?	?	1	0	1
Symphyla	1	1	1	-	0	0	-	0	-	0	-	0	-	-	-	-	-	-	-	-	-	1	1	0	-	1	1	-	-	-	-	1	0	0	0	1	1	1	0	0	1	?	?	?	?	?	1	0	1
Chilopoda	1	0	-	-	0	0	-	0	-	0	-	1	(12)	0	0	1	1	1	0	0	-	1	1	0	-	1	1	-	-	-	-	1	0	0	0	1	1	1	0	0	1	0	1	0	0	0	1	0	1
Diplopoda	1	1	1	-	0	0	-	0	-	0	-	1	2	0	0	1	1	1	0	0	-	1	1	0	-	1	1	-	-	-	-	1	0	0	0	1	1	1	0	0	1	0	?	?	0	0	1	0	1
Rehbachiella	1	0	-	-	0	0	-	0	-	0	-	1	1	?	?	?	?	0	-	0	-	1	1	0	-	1	0	1	-	-	-	-	-	-	-	0	-	1	0	?	?	?	?	?	?	?	1	?	1
Bredocaris	1	0	-	-	0	0	-	0	-	0	-	1	1	?	?	?	?	-	-	0	-	1	0	0	-	1	0	?	?	?	1	-	-	-	-	0	-	0	0	?	?	?	?	?	?	?	1	?	1
Phospatocopina	1	1	0	-	0	0	-	0	-	1	-	0	-	-	-	-	-	-	-	-	-	1	1	0	-	1	0	0	1	0	0	-	-	-	-	1	-	1	0	?	?	?	?	?	?	?	1	?	1
Ostracoda	1	1	1	-	0	0	-	0	-	1	-	0	-	-	-	-	-	-	-	-	-	1	1	0	-	1	0	0	1	0	0	-	-	-	-	1	-	1	0	0	?	?	?	?	?	?	1	0	1
Argulus	1	0	-	-	0	0	-	0	-	0	-	1	1	?	1	?	0	1	0	0	-	1	1	?	?	1	1	-	-	-	-	-	1	0	0	0	-	1	0	0	1	?	?	?	?	?	1	0	1
Artemia	1	0	-	-	0	0	-	0	-	1	1	1	1	1	1	1	0	0	-	1	1	1	1	0	-	1	1	-	-	-	-	1	0	0	0	1	1	0	0	0	0	1	1	0	0	0	1	0	1
Triops	1	1	1	-	0	0	-	0	-	1	2	1	1	1	1	1	0	1	0	0	-	1	1	0	-	1	0	0	1	1	1	0	-	-	-	1	-	1	0	0	0	1	1	0	0	0	1	0	1
Copepoda	1	0	-	-	0	0	-	0	-	0	-	1	1	-	-	-	-	-	-	-	-	1	1	?	?	1	1	-	-	-	-	1	0	0	0	0	-	1	0	0	1	?	?	?	?	?	1	0	1
Cyzicus	1	1	0	-	0	0	-	0	-	0	-	1	1	1	1	1	0	0	0	0	0	1	1	0	-	1	0	0	1	0	1	-	0	0	0	0	-	1	0	0	1	?	1	0	0	?	1	0	1
Cephalocarida	1	0	-	-	0	0	-	0	-	0	-	0	-	-	-	-	-	-	-	-	-	1	1	0	-	1	1	-	-	-	-	0	0	0	0	0	-	1	0	0	0	?	?	1	?	0	1	0	1
Remipedia	1	0	-	-	0	0	-	0	-	0	-	0	-	-	-	-	-	-	-	-	-	1	1	?	?	1	1	-	-	-	-	1	0	0	0	1	1	1	0	0	0	1	?	1	1	?	1	0	1
Isopoda	1	1	1	-	0	0	-	0	-	0	-	1	1	1	1	3	0	1	0	0	-	1	1	1	0	1	1	-	-	-	-	0	0	0	0	1	1	1	0	0	1	1	1	1	1	1	1	0	1
Euphausiacea	1	1	1	-	0	0	-	0	-	1	1	1	1	1	1	2	0	0	-	1	1	1	1	1	1	1	0	1	-	-	-	0	0	0	1	1	-	1	0	0	1	?	?	?	?	?	1	0	1
Anaspidacea	1	1	1	-	0	0	-	0	-	0	-	1	1	1	1	2	0	0	-	1	1	1	1	?	-	1	1	-	-	-	-	1	0	0	0	1	1	1	0	0	1	1	?	?	?	0	1	0	1
Stomatopoda	1	1	1	-	0	0	-	0	-	1	1	1	1	1	1	2	0	0	-	1	1	1	1	1	0	1	1	-	-	-	-	0	0	1	1	1	0	1	1	0	1	1	1	1	?	0	1	0	1
Leptostraca	1	0	-	-	0	0	-	0	-	0	-	1	1	1	1	1	0	0	-	1	1	1	1	?	?	1	0	0	1	1	1	-	-	-	-	1	-	0	1	0	1	1	1	1	?	0	1	0	1
Lepidocaris	1	0	-	-	0	0	-	0	-	?	?	0	-	-	-	?	?	0	-	-	-	1	1	0	-	1	1	-	-	-	-	1	0	0	0	1	1	1	0	?	?	?	?	?	?	?	1	?	1
Nahecaris	1	0	-	-	0	0	-	0	-	0	-	1	1	?	?	?	?	0	-	1	1	1	?	?	?	1	0	0	1	1	1	-	-	-	-	1	-	1	0	?	?	?	?	?	?	?	1	?	1
Cinerocaris	1	0	-	-	0	0	-	0	-	0	-	1	1	?	?	?	?	0	-	1	1	1	1	?	?	1	0	0	1	1	0	-	-	-	-	1	-	?	0	?	?	?	?	?	?	?	1	?	1
Allacma	1	0	-	0	0	0	-	0	-	0	-	1	1	1	1	1	0	1	0	0	-	1	1	0	-	1	1	-	-	-	-	1	0	0	0	1	1	1	0	0	0	?	?	?	?	?	1	0	1
Anurida	1	0	-	0	0	0	-	0	-	0	-	1	1	1	1	1	0	1	0	0	-	1	1	0	-	1	1	-	-	-	-	1	0	0	0	1	1	1	0	0	0	?	?	?	?	?	1	0	1
Zygentoma	1	0	-	0	0	0	-	0	-	1	1	1	1	1	1	1	0	1	0	0	-	1	1	0	-	1	1	-	-	-	-	1	0	0	0	1	1	1	0	0	0	1	1	1	1	0	1	0	1
Odonata	1	0	-	0	0	0	-	0	-	1	1	1	1	1	1	3	0	1	0	0	-	1	1	0	-	1	1	-	-	-	-	1	0	0	0	1	1	1	0	0	1	1	1	1	1	?	1	0	1
Mantodea	1	0	-	0	0	0	-	0	-	1	1	1	1	1	1	2	0	1	0	0	-	1	1	0	-	1	1	-	-	-	-	-	0	0	0	1	1	1	0	0	1	1	1	1	1	1	1	0	1
Coleoptera	1	0	-	1	0	0	-	0	-	0	-	1	1	1	1	3	0	1	0	0	-	1	1	0	-	1	1	-	-	-	-	1	0	0	0	1	1	1	0	0	1	1	1	1	1	1	1	0	1
Diptera	1	0	-	1	0	0	-	0	-	1	1	1	1	1	1	3	0	1	0	0	-	1	1	0	-	1	1	-	-	-	-	1	0	0	0	1	1	1	0	0	1	1	1	1	1	1	1	0	1
Hymenoptera	1	0	-	1	0	0	-	0	-	1	1	1	1	1	1	3	0	1	0	0	-	1	1	0	-	1	1	-	-	-	-	1	0	0	0	1	1	1	0	0	1	1	1	1	1	1	1	0	1
[truncated: 164 more columns]
